# Supplementary figures and images for: Analysis of the Overlength Main Noncoding Region in Metacarcinus magister (Decapoda: Brachyura) and a Phylogenetic Study of the Cancroidea Species
Source: MDPI journal article supplement (doi:10.3390/genes15040437), 2024-03-29

## A: Metacarcinus magister

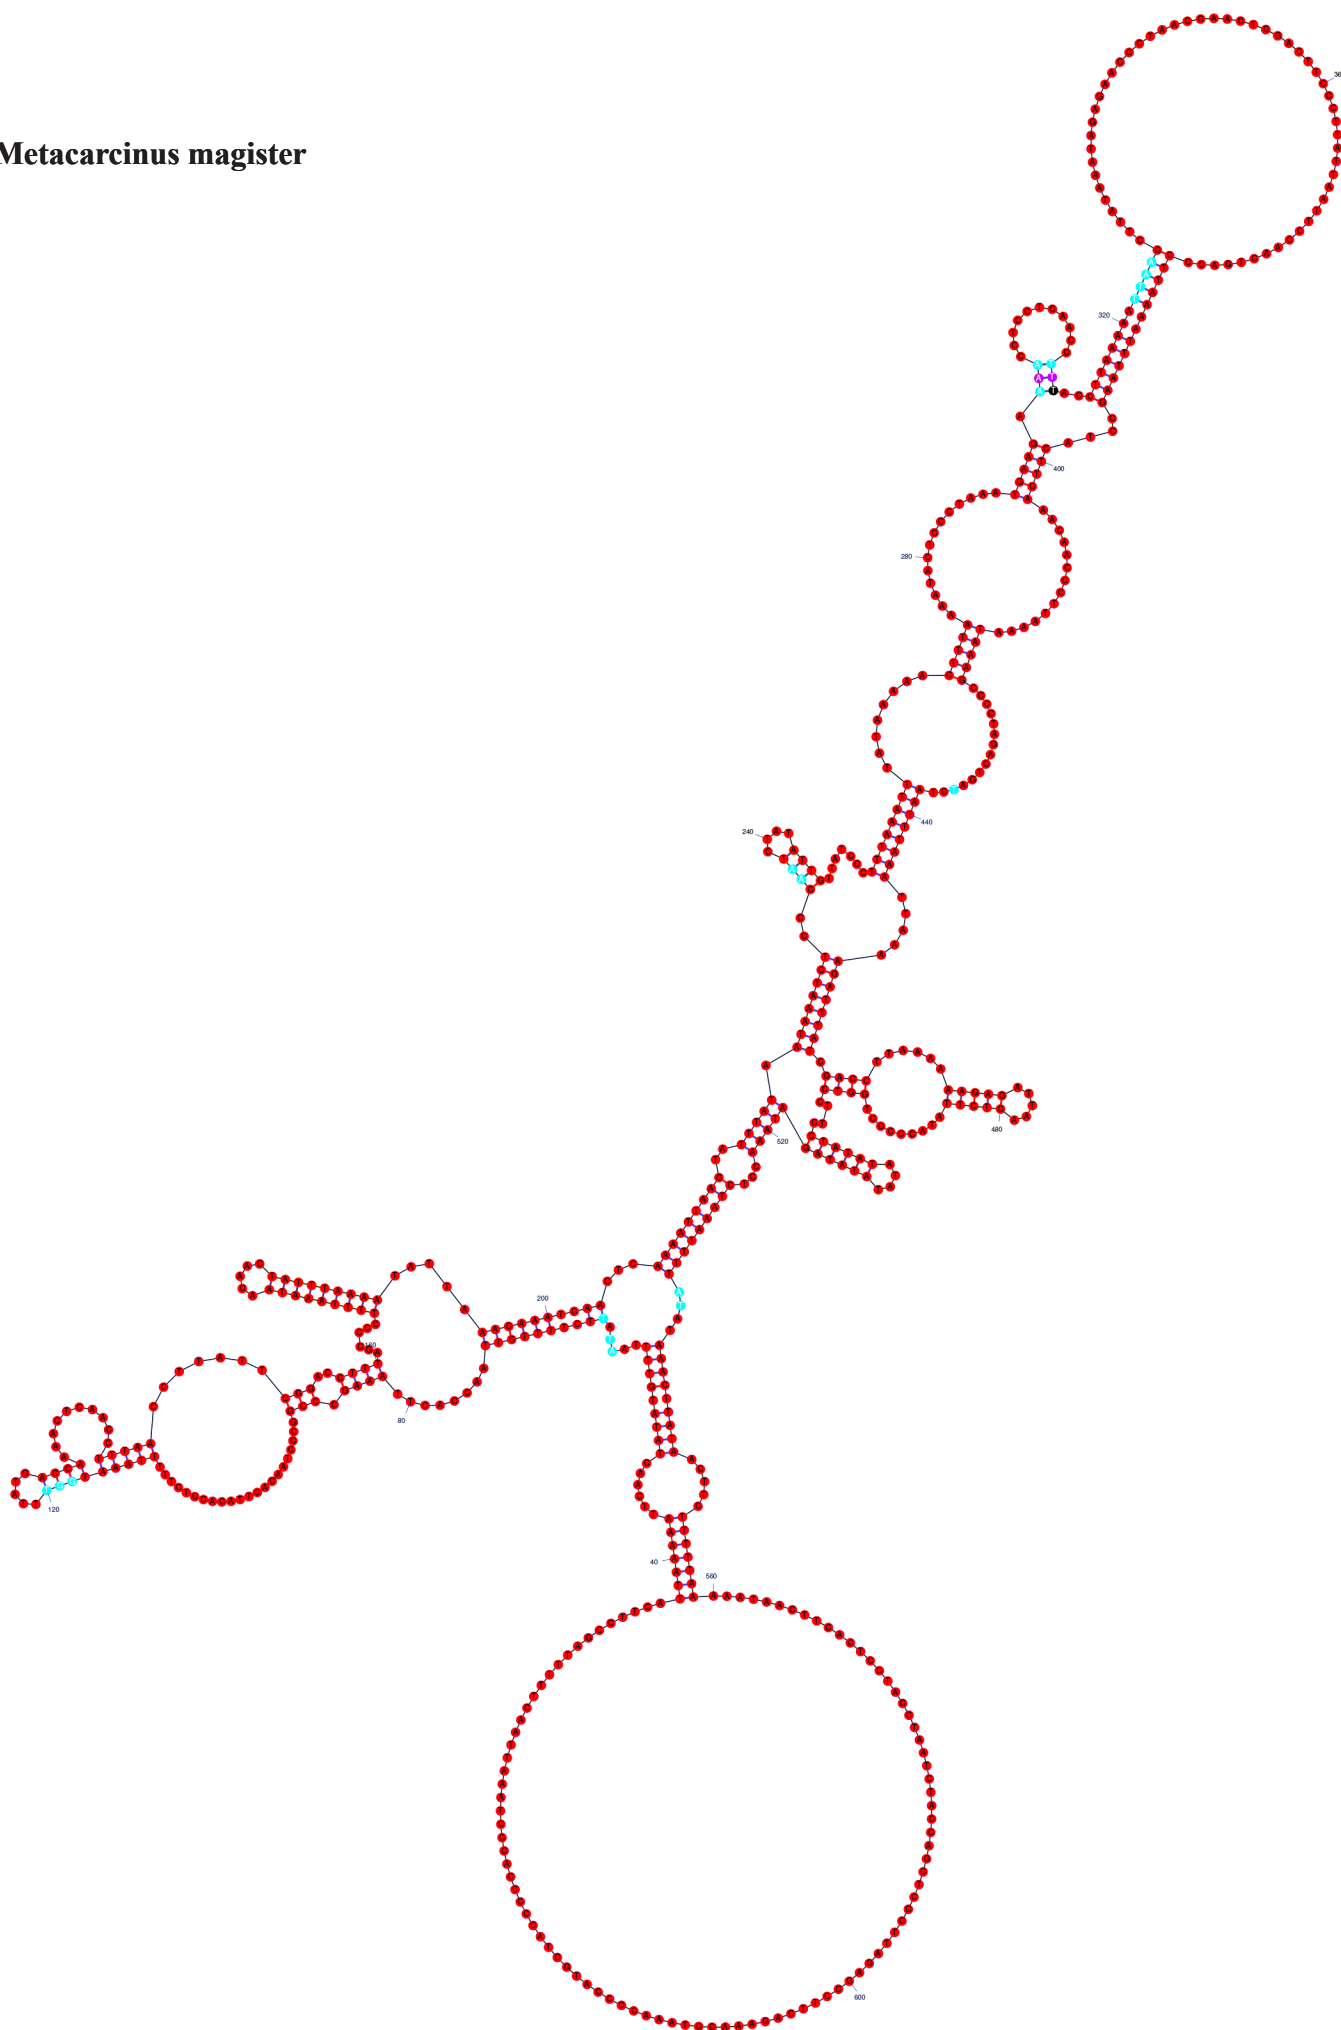

$dG = -3.42$  CR

Supplement: s1 [file s1]

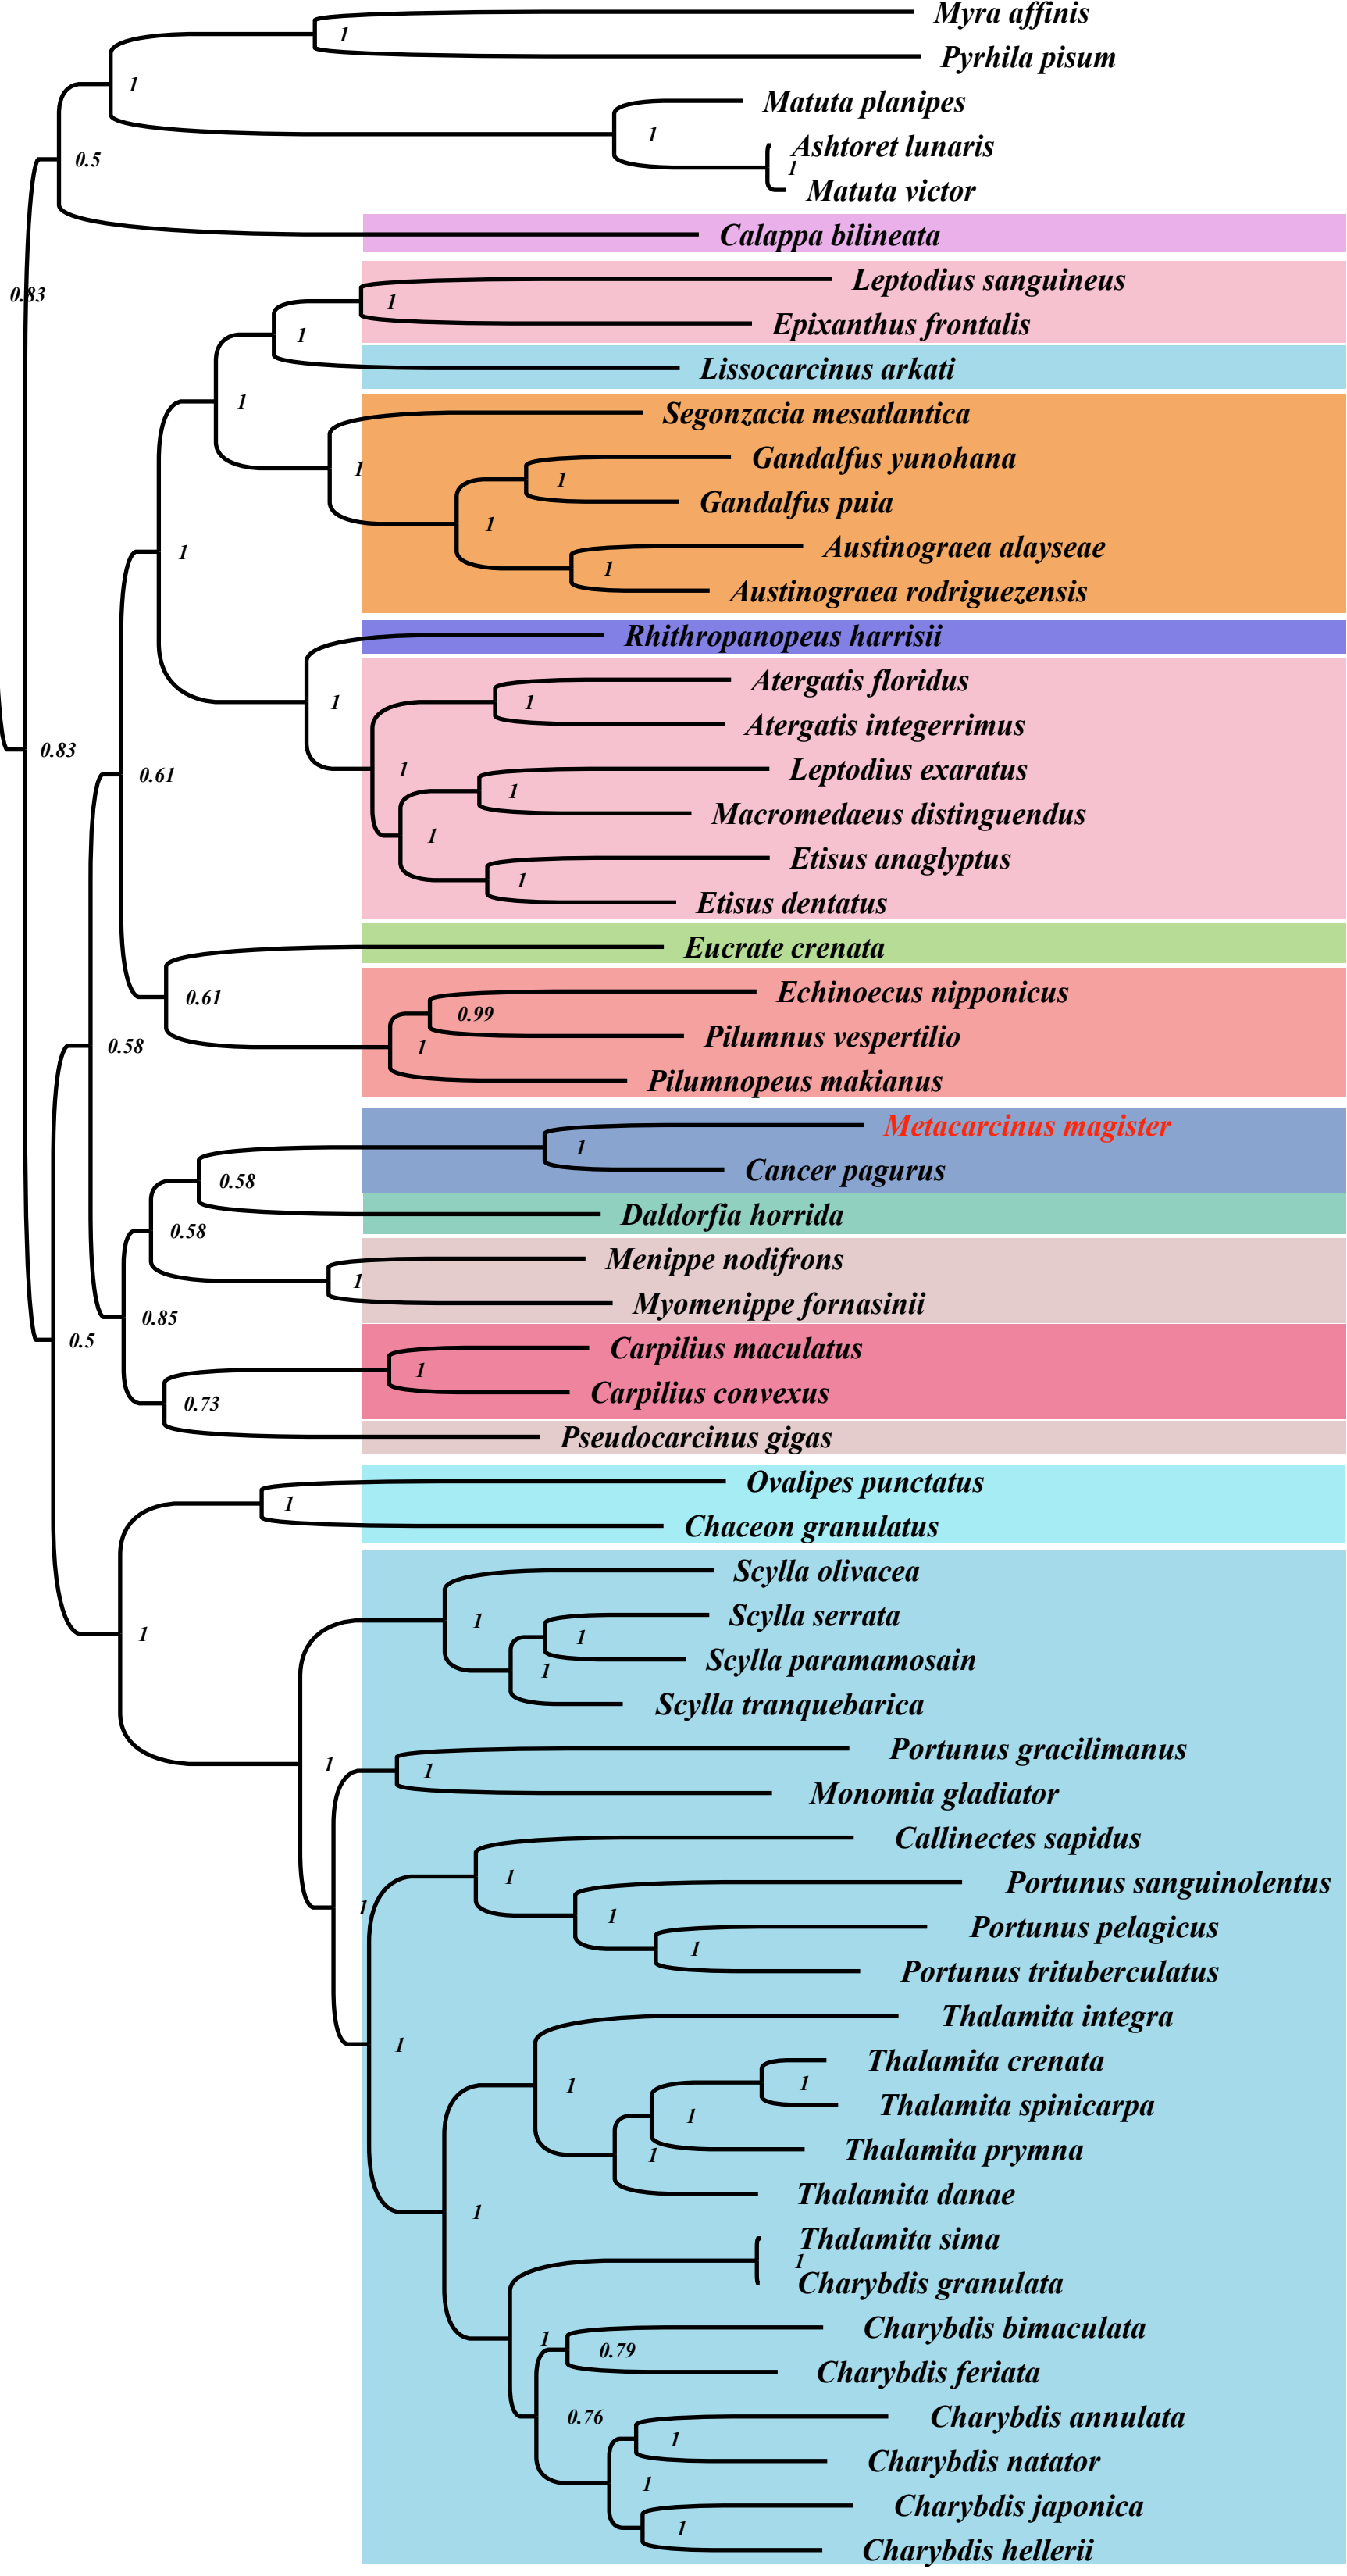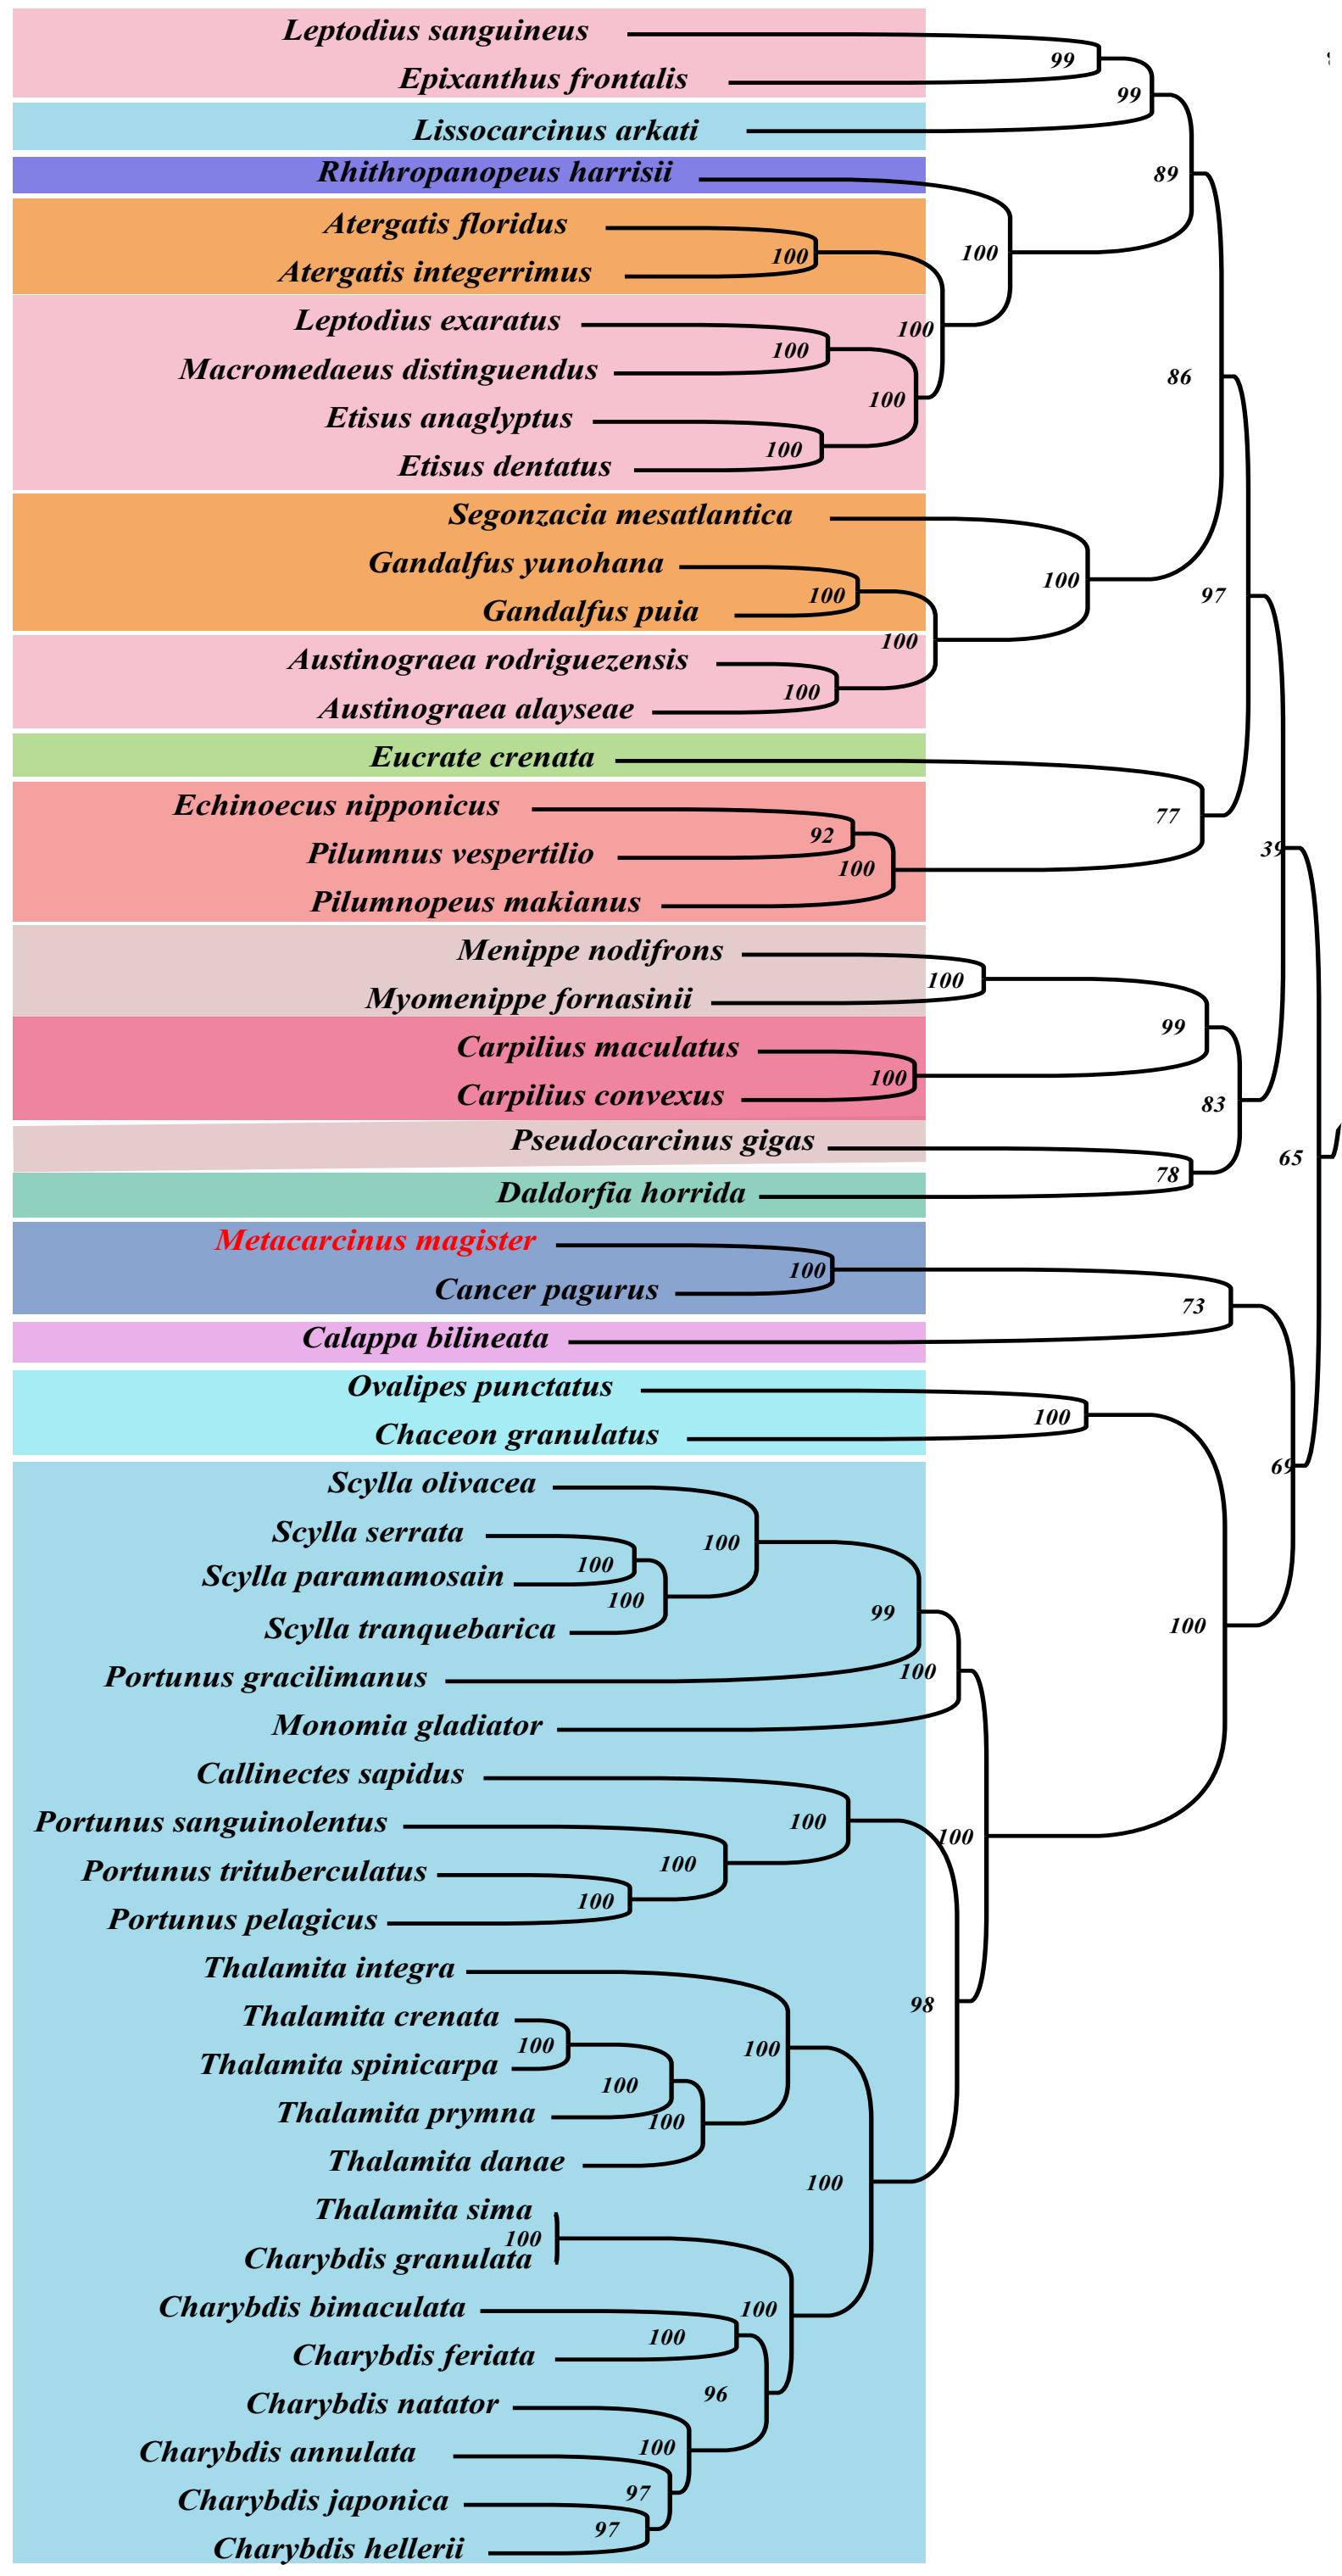

Supplement: s1 [file s1]

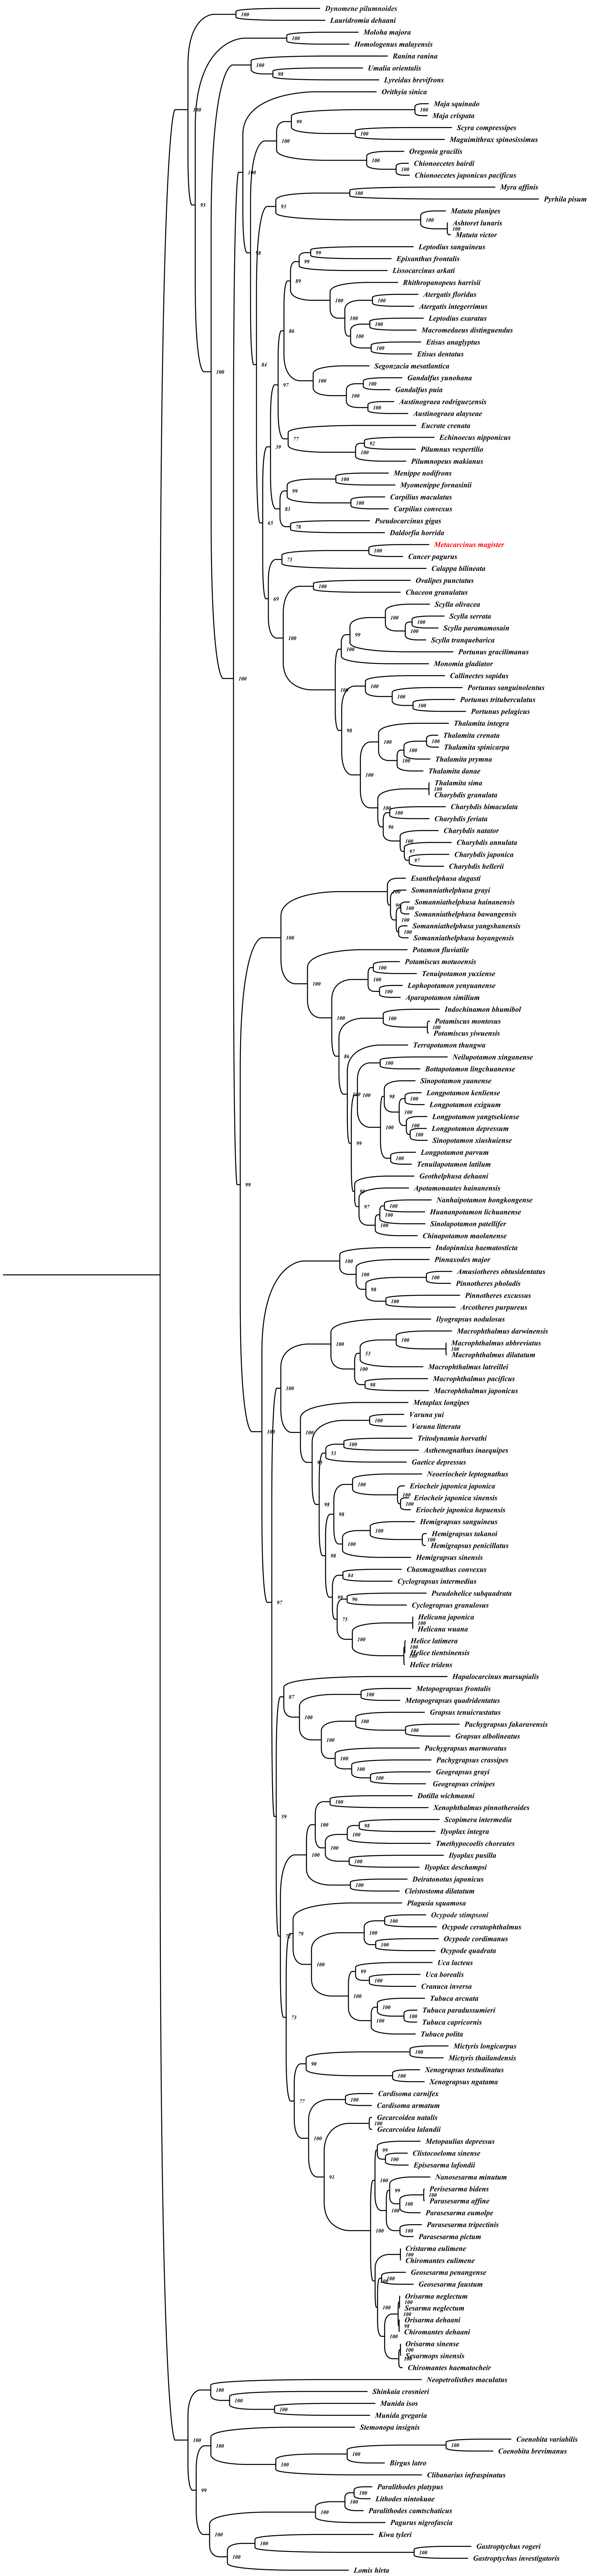

Supplement: s1 [file s1]
